# Supplementary material for: Nasopharyngeal bacterial load as a marker for rapid and easy diagnosis of invasive pneumococcal disease in children from Mozambique
Source: PLoS One. 2017 Sep 14;12(9):e0184762. doi: 10.1371/journal.pone.0184762 (PMC5599037; doi:10.1371/journal.pone.0184762)
Supplement: S1 Dataset — (XLS) [file pone.0184762.s001.xls]

## Sheet: REFINED DATA
GRP	AGE	AGEGRP	GND	WGT	HGT	BMI	WAZ	WAZGRP	NUT	MONTH	SSON	Year	PCV	HIV	MAL	SP	SPQ	SPINV	PCV10	PCV13	ST5	ST1	ST7F/A	ST6AB	ST7BC40	ST14	ST19FCB	ST23F	STO	ST_N	STI	SPCOC	ST_1	ST_2	ST_3	ST_4	RV	ADV	IFV	HRV	HMPV	PIFV	RSV	HGB	HCT	PLT	WBC
1	12.9117	0	1	6.1	63	15.3691	-4.63236	2	1	sep	1	2006	0	1	0	1	6.58786	1	1	1	1	0	0	0	1	0	0	0	0	2	0	1	0	1	0	0	1	0	0	1	0	0	0	69	23.8	268	15.5
1	1.18275	1	0	4.2	51	16.1476	-0.634534	0	0	oct	1	2006	0	1	0	1	7.67119	1	1	1	1	0	0	0	0	0	0	0	1	2	0	1	0	1	0	0	1	0	0	1	0	0	0	92	27.8	483	6.9
1	5.12526	1	1	5.3	53	18.8679	-1.95329	1	1	oct	1	2006	0	0	0	1	4.56008	0	0	0	0	0	0	0	0	0	0	0	0	0	1	99	99	99	99	99	0	0	0	0	0	0	0	62	21.5	950	32
1	4.13963	1	0	6.1	61	16.3934	-0.892445	0	0	oct	1	2006	0		0	1	5.75453	1	1	1	0	0	1	0	1	0	0	0	0	2	0	1	0	1	0	0	1	0	0	1	0	0	0	85	28.3	293	10.1
1	12.386	0	1	6.1	69	12.8124	-4.42178	2	1	nov	0	2006	0	0	0	1	5.86564	0	1	1	0	0	0	1	1	1	0	0	0	3	0	1	0	0	1	0	0	0	0	0	0	0	0	41	15.4	434	14
1	37.2895	0	1	10	84	14.1723	-3.39682	2	1	nov	0	2006	0	1	1	0																					1	1	0	0	0	0	0	55	18.2	354	14.8
1	19.4168	0	0	9.5	71	18.8455	-2.17031	1	1	dec	0	2006	0	1	0	1	7.44897	1	1	1	0	1	0	0	1	1	0	0	0	3	0	1	0	0	1	0	1	1	0	0	0	1	0	70	24	579
1	6.76797	1	0	7.7	68	16.6522	-0.646427	0	0	jan	0	2007	0	0	0	1	6.22675	0	1	1	0	0	0	0	1	0	1	0	0	2	0	1	0	1	0	0	1	0	0	1	0	0	0	106	31.9	553	9.9
1	12.5175	0	0	5.1			-6.96591	2	1	mar	0	2007	0	1	0	1	7.5323	1	1	1	1	0	0	0	0	1	0	0	2	4	0	1	0	0	0	1	0	0	0	0	0	0	0	103	31.2	382	6.1
1	54.1766	0	0	14.6	96	15.842	-1.49111	1	1	mar	0	2007	0	1	0	1	7.36564	1	1	1	0	1	0	1	1	0	0	1	0	4	0	1	0	0	0	1	1	0	1	0	0	0	0	102	32.8	499	15.9
1	6.30801	1	0	4.9			-4.28238	2	1	apr	0	2007	0	1	0	0																					0	0	0	0	0	0	0	124	39.9	83	6.5
1	27.4004	0	1	11.8	89	14.8971	-0.59843	0	0	jun	1	2007	0	1	0	1	7.81008	1	1	1	0	1	0	0	1	0	0	0	0	2	0	1	0	1	0	0	0	0	0	0	0	0	0	65	21.7	319	16.9
1	24.5092	0	0	9.9			-2.39877	1	1	jun	1	2007	0		0	1	8.22675	0	1	1	0	0	0	1	1	0	0	0	2	4	0	1	0	0	0	1	0	0	0	0	0	0	0	69	23.5	762	19.1
1	12.7146	0	1	9.7	74	17.7137	-0.0265375	0	0	jun	1	2007	0	1	0	1	6.89341	0	1	1	0	0	0	0	1	1	0	0	1	3	0	1	0	0	1	0	0	0	0	0	0	0	0	51	18.4	175	10
1	9.82341	1	1	6	67	13.366	-3.47955	2	1	jul	1	2007	0	0	0	1	6.5323	0	1	1	0	0	0	1	1	0	0	0	2	4	0	1	0	0	0	1	0	0	0	0	0	0	0	76	22.3	536	8.5
1	11	1	1	7.4	72	14.2747	-2.03222	1	1	mar	0	2011	0	0	0	1	8.47675	0	1	1	0	0	0	0	1	0	0	0	3	4	0	1	0	0	0	1	0	0	0	0	0	0	0	99	29.4	441	8
1	6	1	0	6	58	17.8359	-2.34461	1	1	nov	0	2011	0	1	0	1	7.86564	1	1	1	1	0	0	1	1	0	0	0	0	3	0	1	0	0	1	0	1	0	0	1	0	0	0	66	22.8	282	28.1
1	12	1	0	6.9	76	11.946	-3.77632	2	1	feb	0	2012	0	1	0	1	7.81008	1	1	1	1	0	0	0	1	0	0	0	1	3	0	1	0	0	1	0	1	0	0	1	0	0	0	66	26.8	421	15
1	27	0	0	10	85.5	13.6794	-2.57509	1	1	aug	1	2012	0	0	0	1	7.2823	1	1	1	0	1	0	0	1	1	0	0	0	3	0	1	0	0	1	0	0	0	0	0	0	0	0	103	34.1	428	18.6
1	13	0	0	5.9	66	13.5445	-5.61743	2	1	oct	1	2012	0	1	0	1	7.76286	0	1	1	0	0	0	0	1	0	0	0	0	1	0	0	1	0	0	0	0	0	0	0	0	0	0	78	23.3	422	7.4
1	38	0	0	14	99.5	14.1411	-0.392725	0	0	oct	1	2012	0	0	0	1	7.8823	0	1	1	0	0	0	0	1	0	0	1	2	4	0	1	0	0	0	1	1	1	0	1	0	0	0
1	6	1	0	8.3	73	15.5752	0.418258	0	0	sep	1	2012	0	0	0	1	7.22675	0	1	1	0	0	0	0	1	0	1	1	1	4	0	1	0	0	0	1	0	0	0	0	0	0	0	74	23	960	9.4
1	20	0	0	10	83	14.5159	-1.75964	1	1	dec	0	2012	0	0	1	1	7.6323	0	1	1	0	0	0	0	1	0	0	1	0	2	0	1	0	1	0	0	1	0	0	1	0	0	0	49	15.3	100	12.1
1	10	1	0	8.7	70	17.7551	-0.945187	0	0	nov	0	2012	0	0	0	1	6.4823	1	1	1	1	0	0	0	0	0	0	0	0	1	0	0	1	0	0	0	1	1	0	0	0	0	0	100	30.5	367	24.3
1	17	0	0	7.8	74	14.244	-3.70481	2	1	sep	1	2013	1	0	0	1	7.36564	1	1	1	0	1	0	0	0	0	0	1	0	2	0	1	0	1	0	0	1	0	0	1	0	0	0	74	22.6	852	21.8
1	10	1	0	10.3	76.5	17.6001	0.570761	0	0	feb	0	2013	0	0	0	1	5.72675	0	1	1	0	0	0	0	0	0	0	1	0	1	0	0	1	0	0	0	0	0	0	0	0	0	0	70	21.4	1178	51
1	25	0	0	10.7	86	14.4673	-1.69894	1	1	jul	1	2013	1	0	0	1	7.61564	1	1	1	1	0	0	0	0	0	0	0	1	2	0	1	0	1	0	0	0	0	0	0	0	0	0	105	31.8	380	16
1	55	0	0	13	107	11.3547	-2.73255	1	1	mar	0	2014	1	1	0	1	6.05175	0	0	0	0	0	0	0	0	0	0	0	0	0	1	99	99	99	99	99	1	0	0	1	0	0	0	69	18.5	398	4.5
1	20	0	1	7.2	74.5	12.9724	-4.96252	2	1	may	1	2014	1	1	0	1	6.25453	0	0	0	0	0	0	0	0	0	0	0	0	0	1	99	99	99	99	99	0	0	0	0	0	0	0	65	18.9	349	11.5
1	52.918	0	0	15.2	103	14.3275	-1.00591	1	1	may	1	2014	1	0	0	1	6.58786	0	1	1	0	0	0	1	0	0	0	0	0	1	0	0	1	0	0	0	0	0	0	0	0	0	0	85	25.6	342	23.2
0	3.71466	1	0	7	60.5	19.1244	0.560273	0	0	sep	1	2012	0		0	1	7.15878	0	1	1	0	0	0	1	1	1	0	0	0	3	0	1	0	0	1	0	1	0	0	0	0	1	0	116	34.2	516	15.16
0	6.1144	1	0	10.2	67	22.7222	2.12	0	0	sep	1	2012	0		0	1	7.12822	0	1	1	0	0	0	0	1	0	0	0	0	1	0	0	1	0	0	0	1	1	0	0	0	0	0	99	29.1	516	14.39
0	6.18014	1	0	8.7	69.5	18.0115	0.720246	0	0	oct	1	2012	0		0	0																					1	0	0	1	0	0	0	82	24.5	691	12.16
0	5.52268	1	0	7.9	60	21.9444	0.279992	0	0	oct	1	2012	0		0	1	6.93655	0	1	1	0	0	0	1	0	0	1	0	0	2	0	1	0	1	0	0	1	0	0	1	0	0	0	86	26.7	537	17.95
0	5.78567	1	0	8	67	17.8213	0.228467	0	0	oct	1	2012	0		0	1	6.25044	0	1	1	0	0	0	1	0	0	0	1	0	2	0	1	0	1	0	0	1	0	0	1	0	0	0	89	26.5	458	16.77
0	3.87903	1	0	8.6	62	22.3725	2.18605	0	0	oct	1	2012	0		0	1	6.21433	0	1	1	0	0	0	0	0	0	0	1	0	1	0	0	1	0	0	0	1	0	0	1	0	0	0	103	32	642	10.63
0	3.9119	1	0	7.1	60.1	19.6566	0.516385	0	0	oct	1	2012	0		0	1	6.75044	0	1	1	0	0	0	0	0	1	0	0	0	1	0	0	1	0	0	0	0	0	0	0	0	0	0	90	27.2	761	10.9
0	5.88429	1	0	8.8	68	19.0311	0.984459	0	0	oct	1	2012	0		0	1	6.41711	0	1	1	0	0	0	0	0	0	0	0	1	2	0	1	0	1	0	0	1	0	0	1	0	0	0	101	31.4	618	11.67
0	5.42406	1	0	7.5	65	17.7515	-0.0981697	0	0	oct	1	2012	0		0	1	5.51711	0	0	1	0	0	0	1	0	0	0	0	0	1	0	0	1	0	0	0	0	0	0	0	0	0	0	84	24.7	573	16.33
0	5.19395	1	0	8.9	66	20.4316	1.50196	0	0	oct	1	2012	0		0	1	5.55322	0	1	1	0	0	0	0	0	0	0	0	1	1	0	0	1	0	0	0	0	0	0	0	0	0	0
0	3.87903	1	0	7	62	18.2102	0.425441	0	0	oct	1	2012	0		0	1	4.90044	0	1	1	0	0	0	0	0	0	1	0	0	1	0	0	1	0	0	0	0	0	0	0	0	0	0	91	26.2	463	12.77
0	11.3741	1	1	6.7	64	16.3574	-3.10866	2	1	oct	1	2012	0		0	1	4.35878	0	0	0	0	0	0	0	0	0	0	0	0	0	1	99	99	99	99	99	0	0	0	0	0	0	0	95	28.3	672	11.38
0	11.3741	1	0	7	65	16.568	-3.44266	2	1	oct	1	2012	0		0	1	5.45322	0	0	0	0	0	0	0	0	0	0	0	0	0	1	99	99	99	99	99	0	0	0	0	0	0	0	119	35.6	375	13.45
0	7.65943	1	0	7.2	65	17.0414	-1.68907	1	1	oct	1	2012	0		0	1	5.16155	0	0	0	0	0	0	0	0	0	0	0	0	0	1	99	99	99	99	99	0	0	0	0	0	0	0	94	27.6	528	15.29
0	9.07298	1	1	8	62	20.8117	-0.584372	0	0	oct	1	2012	0		0	1	5.59211	0	0	0	0	0	0	0	0	0	0	0	1	1	0	0	1	0	0	0	1	0	0	1	0	0	0	103	30.6	528	21.19
0	11.1111	1	0	8.4	68	18.1661	-1.63211	1	1	oct	1	2012	0		0	0																					0	0	0	0	0	0	0	104	31.8	480	10.81
0	9.69757	1	1	8.8	71	17.4569	0.0365971	0	0	oct	1	2012	0		0	1	6.031	0	0	1	0	0	0	0	0	0	0	0	1	1	0	0	1	0	0	0	1	0	0	1	0	0	0	108	33.5	593	14.33
0	10.7824	1	1	8.1	65	19.1716	-1.11401	1	1	oct	1	2012	0		0	1	5.96155	0	0	0	0	0	0	0	0	0	0	0	0	0	1	99	99	99	99	99	0	0	0	0	0	0	0	178	51.7	273	7.54
0	11.0454	1	1	7.2	68	15.5709	-2.30525	1	1	oct	1	2012	0		0	1	3.731	0	0	0	0	0	0	0	0	0	0	0	0	0	1	99	99	99	99	99	0	0	0	0	0	0	0	87	23.9	556	8.86
0	8.77712	1	0	10.4	74	18.992	1.08155	0	0	oct	1	2012	0		0	1	5.38655	0	1	1	0	0	0	0	0	0	1	0	0	1	0	0	1	0	0	0	0	0	0	0	0	0	0	98	29.1	225	15.93
0	11.0782	1	0	8.3	68	17.9498	-1.73344	1	1	oct	1	2012	0		0	1	4.40878	0	1	1	0	0	0	0	0	0	1	0	0	1	0	0	1	0	0	0	0	0	0	0	0	0	0
0	7.95529	1	0	8.8	66	20.202	-0.048617	0	0	oct	1	2012	0		0	1	6.81433	0	1	1	0	0	0	1	0	0	0	1	0	2	0	1	0	1	0	0	1	0	0	1	0	0	0	94	27.8	359	10.37
0	8.84287	1	0	9.4	72	18.1327	0.170083	0	0	oct	1	2012	0		0	1	5.50044	0	1	1	0	0	0	0	0	0	0	0	1	1	0	0	1	0	0	0	1	0	0	1	0	0	0	93	28.6	577	18.41
0	9.89481	1	0	7.9	69	16.5932	-1.79284	1	1	oct	1	2012	0		0	1	5.72544	0	0	0	0	0	0	0	0	0	0	0	0	0	1	99	99	99	99	99	0	0	0	0	0	0	0	104	31.8	586	15.61
0	9.86193	1	0	7.9	67	17.5986	-1.78084	1	1	oct	1	2012	0		0	1	7.42267	0	0	1	0	0	0	0	0	0	0	0	1	1	0	0	1	0	0	0	0	0	0	0	0	0	0	99	28.4	410	15.96
0	11.9329	1	1	7.3	71	14.4813	-2.49257	1	1	oct	1	2012	0		0	1	6.44211	0	0	1	0	0	0	0	1	0	0	0	1	2	0	1	0	1	0	0	1	0	0	1	0	0	0	103	30.6	634	11.36
0	8.3169	1	0	6.4	64	15.625	-3.07603	2	1	nov	0	2012	0		0	1	6.731	0	1	1	0	0	0	0	0	0	1	0	0	1	0	0	1	0	0	0	1	0	0	1	0	0	0	109	32.1	388	15.77
0	7.10059	1	0	8.7	66	19.9725	0.244709	0	0	nov	0	2012	0		0	1	6.45322	0	1	1	0	0	0	0	0	0	0	0	1	1	0	0	1	0	0	0	1	0	0	1	0	0	0	111	33.6	457	12.21
0	12	1	0	10	73	18.7652	-0.288827	0	0	nov	0	2012	0		0	1	6.71989	0	1	1	0	0	0	0	1	1	0	0	1	3	0	1	0	0	1	0	0	0	0	0	0	0	0	122	36.5	543	14.63
0	9.63182	1	0	8	72	15.4321	-1.57999	1	1	nov	0	2012	0		0	1	5.28378	1	1	1	1	0	0	0	0	0	0	0	0	1	0	0	1	0	0	0	1	0	0	1	0	0	0	93	28.7	539	16.49
0	8.64563	1	1	9.9	73	18.5776	1.52854	0	0	nov	0	2012	0		0	1	6.71989	0	1	1	0	0	0	0	0	0	1	0	1	2	0	1	0	1	0	0	0	0	0	0	0	0	0	111	33.6	372	16.16
0	11.0782	1	1	8	71	15.8699	-1.33198	1	1	nov	0	2012	0		0	1	6.34489	0	1	1	0	0	0	0	0	0	1	0	0	1	0	0	1	0	0	0	0	0	0	0	0	0	0	110	33.2	377	10.61
0	16.2393	0	1	9.5	73	17.827	-1.07781	1	1	nov	0	2012	0		0	1	7.45878	0	1	1	0	0	0	0	1	1	0	1	0	3	0	1	0	0	1	0	0	0	0	0	0	0	0	99	30.7	331	15.76
0	22.2222	0	0	11.9	82	17.6978	-0.390807	0	0	nov	0	2012	0		0	1	5.756	0	0	0	0	0	0	0	0	0	0	0	0	0	1	99	99	99	99	99	0	0	0	0	0	0	0	114	33	562	11.76
0	16.6009	0	0	11.3	77	19.0589	-0.115559	0	0	nov	0	2012	0		0	1	7.20322	0	1	1	0	0	0	1	1	0	0	0	1	3	0	1	0	0	1	0	0	0	0	0	0	0	0	116	34.2	32	14.41
0	21.1703	0	0	11.1	82	16.508	-0.919867	0	0	nov	0	2012	0		0	0																					0	0	0	0	0	0	0	105	30.8	478	7.75
0	14.6614	0	1	8.5	72	16.3966	-1.81621	1	1	nov	0	2012	0		0	1	3.85878	0	0	0	0	0	0	0	0	0	0	0	0	0	1	99	99	99	99	99	0	0	0	0	0	0	0	103	31.3	354	10.1
0	23.5043	0	1	11.2	79	17.9458	-0.640271	0	0	nov	0	2012	0		0	1	6.20044	0	0	0	0	0	0	0	0	0	0	0	0	0	1	99	99	99	99	99	0	0	0	0	0	0	0	106	33	389	10.21
0	17.3899	0	1	8.2	70.5	16.4982	-2.85396	1	1	nov	0	2012	0		0	1	3.91989	0	0	0	0	0	0	0	0	0	0	0	0	0	1	99	99	99	99	99	0	0	0	0	0	0	0	109	33.1	370	12.56
0	21.8277	0	0	11.5	80	17.9688	-0.665281	0	0	nov	0	2012	0		0	1	4.51711	1	1	1	0	0	1	1	0	0	0	0	0	2	0	1	0	1	0	0	0	0	0	0	0	0	0
0	14.1026	0	0	9.1	72	17.554	-1.66097	1	1	nov	0	2012	0		0	1	5.456	0	0	1	0	0	0	1	0	0	0	0	0	1	0	0	1	0	0	0	0	0	0	0	0	0	0	118	34.8	334	14.65
0	20.4142	0	0	11.6	76	20.0831	-0.41485	0	0	nov	0	2012	0		0	1	7.32267	0	0	0	0	0	0	0	1	0	0	0	1	2	0	1	0	1	0	0	0	0	0	0	0	0	0	107	32.4	519	12.44
0	19.2965	0	0	9.7	73	18.2023	-1.95441	1	1	nov	0	2012	0		0	1	4.91989	0	0	1	0	0	0	0	0	0	0	0	1	1	0	0	1	0	0	0	0	0	0	0	0	0	0	98	31	728	16.4
0	13.5766	0	1	8.8	68	19.0311	-1.18788	1	1	nov	0	2012	0		0	1	6.456	0	1	1	0	0	0	1	0	0	0	0	0	1	0	0	1	0	0	0	0	0	0	0	0	0	0	109	34.4	462	14.28
0	16.1736	0	0	11.3	70.5	22.7353	-0.0441997	0	0	nov	0	2012	0		0	1	5.76155	0	1	1	0	0	0	0	1	0	0	1	0	2	0	1	0	1	0	0	0	0	0	0	0	0	0	107	31.8	367	8.37
0	17.883	0	1	11.1	79	17.7856	0.115973	0	0	nov	0	2012	0		0	0																					1	0	0	1	0	0	0	95	29.2	493	15.39
0	13.4451	0	1	10.5	76	18.1787	0.522772	0	0	nov	0	2012	0		0	1	6.76711	0	0	0	0	0	0	0	0	0	0	0	1	1	0	0	1	0	0	0	0	0	0	0	0	0	0	95	30.1	529	14.67
0	16.4037	0	0	15.5	77	26.1427	2.7566	0	0	nov	0	2012	0		0	1	5.75322	0	0	0	0	0	0	0	0	0	0	0	0	0	1	99	99	99	99	99	0	0	0	0	0	0	0	79	24.2	519	8.95
0	49.9343	0	0	13.6	92	16.0681	-1.78817	1	1	nov	0	2012	0		0	1	6.45044	0	1	1	0	0	0	1	0	0	0	0	1	2	0	1	0	1	0	0	1	0	0	1	0	0	0	114	33.8	494	10.88
0	48.2577	0	0	14.6	108	12.5171	-0.953352	0	0	nov	0	2012	0		0	1	4.41433	0	1	1	0	0	0	0	0	1	0	0	0	1	0	0	1	0	0	0	0	0	0	0	0	0	0	124	36.2	615	8.8
0	45.6936	0	0	15	92	17.7221	-0.474319	0	0	nov	0	2012	0			0																					0	0	0	0	0	0	0	59	28.4	438	8.82
0	22.7482	0	0	10.7	80.5	16.5117	-1.45164	1	1	nov	0	2012	0		0	0																					0	0	0	0	0	0	0	95	29.7	424	9.36
0	23.2084	0	1	9	75	16	-2.91481	1	1	nov	0	2012	0		0	1	4.50044	0	1	1	0	0	0	1	0	0	1	0	0	2	0	1	0	1	0	0	0	0	0	0	0	0	0	85	28.4	212	14.31
0	16.8639	0	0	11	76	19.0443	-0.40716	0	0	nov	0	2012	0		0	0																					0	0	0	0	0	0	0	120	35.7	499	15.33
0	14.4313	0	1	7.2	66	16.5289	-3.44804	2	1	nov	0	2012	0		0	1	7.22267	0	1	1	0	0	0	0	0	0	1	0	0	1	0	0	1	0	0	0	0	0	0	0	0	0	0	95	29.3	641	12.65
0	31.9855	0	0	17	93	19.6555	1.83266	0	0	nov	0	2012	0		0	1	5.54211	0	1	1	0	0	0	0	0	0	0	1	0	1	0	0	1	0	0	0	0	0	0	0	0	0	0	106	32.7	480	15.87
0	36.7521	0	0	16.1	97	17.1113	0.939263	0	0	nov	0	2012	0		0	1	4.36433	0	0	1	0	0	0	1	0	0	0	0	0	1	0	0	1	0	0	0	0	0	0	0	0	0	0	118	34.6	563	8.07
0	58.0868	0	0	18.4	108	15.775	0.154472	0	0	nov	0	2012	0		0	1	5.931	0	1	1	0	0	0	0	0	1	0	0	1	2	0	1	0	1	0	0	0	0	0	0	0	0	0	117	35.2	283	11.13
0	26.7258	0	1	8	75	14.2222	-4.90128	2	1	nov	0	2012	0		0	1	4.17822	0	0	0	0	0	0	0	0	0	0	0	0	0	1	99	99	99	99	99	0	0	0	0	0	0	0	91	29	592	13.96
0	54.142	0	0	15.2	97.5	15.9895	-1.11409	1	1	nov	0	2012	0		0	1	5.66433	0	1	1	0	0	0	0	0	1	0	0	0	1	0	0	1	0	0	0	0	0	0	0	0	0	0	99	29.4	388	6.91

## Sheet: Hoja2
6.58786	1	6.1	8.05	6.96794
7.67119	1	4.2
4.56008	1	5.3					6.58786	7.00163
5.75453	1	6.1					7.67119
5.86564	1	6.1					4.56008
7.44897	1	10					5.75453			7.36564	6.74757
6.22675	1	9.5					5.86564			7.61564
7.5323	1	7.7					7.44897			6.05175
7.36564	1	5.1					6.22675			6.25453
7.81008	1	14.6					7.5323			6.58786
8.22675	1	4.9					7.36564
6.89341	1	11.8					7.81008
6.5323	1	9.9					8.22675
8.47675	1	9.7					6.89341
7.86564	1	6					6.5323
7.81008	1	7.4					8.47675
7.2823	1	6					7.86564
7.76286	1	6.9					7.81008
7.8823	1	10					7.2823
7.22675	1	5.9					7.76286
7.6323	1	14					7.8823
6.4823	1	8.3					7.22675
7.36564	1	10					7.6323
5.72675	1	8.7					6.4823
7.61564	1	7.8					5.72675
6.05175	1	10.3
6.25453	1	10.7
6.58786	1	13
7.15878	1	7.2
7.12822	1	15.2
6.93655	0	7	8.8	5.73172
6.25044	0	10.2
6.21433	0	8.7
6.75044	0	7.9
6.41711	0	8
5.51711	0	8.6
5.55322	0	7.1
4.90044	0	8.8
4.35878	0	7.5
5.45322	0	8.9
5.16155	0	7
5.59211	0	6.7
6.031	0	7
5.96155	0	7.2
3.731	0	8
5.38655	0	8.4
4.40878	0	8.8
6.81433	0	8.1
5.50044	0	7.2
5.72544	0	10.4
7.42267	0	8.3
6.44211	0	8.8
6.731	0	9.4
6.45322	0	7.9
6.71989	0	7.9
5.28378	0	7.3
6.71989	0	6.4
6.34489	0	8.7
7.45878	0	10
5.756	0	8
7.20322	0	9.9
3.85878	0	8
6.20044	0	9.5
3.91989	0	11.9
4.51711	0	11.3
5.456	0	11.1
7.32267	0	8.5
4.91989	0	11.2
6.456	0	8.2
5.76155	0	11.5
6.76711	0	9.1
5.75322	0	11.6
6.45044	0	9.7
4.41433	0	8.8
4.50044	0	11.3
7.22267	0	11.1
5.54211	0	10.5
4.36433	0	15.5
5.931	0	13.6
4.17822	0	14.6
5.66433	0	15
	0	10.7
	0	9
	0	11
	0	7.2
	0	17
	0	16.1
	0	18.4
	0	8
	0	15.2

## Sheet: Hoja3
1	69	23.8	268	15.5	74	23.5	421	14.4
1	92	27.8	483	6.9
1	62	21.5	950	32
1	85	28.3	293	10.1
1	41	15.4	434	14
1	55	18.2	354	14.8
1	70	24	579
1	106	31.9	553	9.9
1	103	31.2	382	6.1
1	102	32.8	499	15.9
1	124	39.9	83	6.5
1	65	21.7	319	16.9
1	69	23.5	762	19.1
1	51	18.4	175	10
1	76	22.3	536	8.5
1	99	29.4	441	8
1	66	22.8	282	28.1
1	66	26.8	421	15
1	103	34.1	428	18.6
1	78	23.3	422	7.4
1
1	74	23	960	9.4
1	49	15.3	100	12.1
1	100	30.5	367	24.3
1	74	22.6	852	21.8
1	70	21.4	1178	51
1	105	31.8	380	16
1	69	18.5	398	4.5
1	65	18.9	349	11.5
1	85	25.6	342	23.2
0	116	34.2	516	15.16	103	31	486.5	12.77
0	99	29.1	516	14.39
0	82	24.5	691	12.16
0	86	26.7	537	17.95
0	89	26.5	458	16.77
0	103	32	642	10.63
0	90	27.2	761	10.9
0	101	31.4	618	11.67
0	84	24.7	573	16.33
0
0	91	26.2	463	12.77
0	95	28.3	672	11.38
0	119	35.6	375	13.45
0	94	27.6	528	15.29
0	103	30.6	528	21.19
0	104	31.8	480	10.81
0	108	33.5	593	14.33
0	178	51.7	273	7.54
0	87	23.9	556	8.86
0	98	29.1	225	15.93
0
0	94	27.8	359	10.37
0	93	28.6	577	18.41
0	104	31.8	586	15.61
0	99	28.4	410	15.96
0	103	30.6	634	11.36
0	109	32.1	388	15.77
0	111	33.6	457	12.21
0	122	36.5	543	14.63
0	93	28.7	539	16.49
0	111	33.6	372	16.16
0	110	33.2	377	10.61
0	99	30.7	331	15.76
0	114	33	562	11.76
0	116	34.2	32	14.41
0	105	30.8	478	7.75
0	103	31.3	354	10.1
0	106	33	389	10.21
0	109	33.1	370	12.56
0
0	118	34.8	334	14.65
0	107	32.4	519	12.44
0	98	31	728	16.4
0	109	34.4	462	14.28
0	107	31.8	367	8.37
0	95	29.2	493	15.39
0	95	30.1	529	14.67
0	79	24.2	519	8.95
0	114	33.8	494	10.88
0	124	36.2	615	8.8
0	59	28.4	438	8.82
0	95	29.7	424	9.36
0	85	28.4	212	14.31
0	120	35.7	499	15.33
0	95	29.3	641	12.65
0	106	32.7	480	15.87
0	118	34.6	563	8.07
0	117	35.2	283	11.13
0	91	29	592	13.96
0	99	29.4	388	6.91
